# Supplementary material for: Using Selective Enzymes to Measure Noncanonical DNA Building Blocks: dUTP, 5-Methyl-dCTP, and 5-Hydroxymethyl-dCTP
Source: MDPI journal article supplement (doi:10.3390/biom13121801), 2023-12-15
Supplement: s1 [file s1]

# Supplementary Materials

Supplementary Table S1: Oligonucleotides used in the present study

|                     |                                                                                                                                                                                                                           |
|---------------------|---------------------------------------------------------------------------------------------------------------------------------------------------------------------------------------------------------------------------|
| Oligo name          | 5'-3' sequence                                                                                                                                                                                                            |
| Detection primer    | CCGCCTCCACCGCC                                                                                                                                                                                                            |
| dTTP-template-197nt | TCGCTCGCTCTTGCCTCGGTCCTCGCTCGCTCTTGCCTCGGTCCTCGCTCGC<br>TCTTGCCTCGGTCCTCGCTCGCTCTTGCCTCGGTCCTCGCTCGCTCTTGCCTC<br>GGTCCTCGCTCGCTCTTGCCTCGGTCCTCGCTCGCTCTTGCCTCGGTCCTCGC<br>TCGCTCTTGCCTCGGTCCTTT <b>ATTGGCGGTGGAGGCGG</b>  |
| dCTP-template-197nt | CCACTCACTCTTACCTCAATCCCCACTCACTCTTACCTCAATCCCCACTCACTC<br>TTACCTCAATCCCCACTCACTCTTACCTCAATCCCCACTCACTCTTACCTCAAT<br>CCCCACTCACTCTTACCTCAATCCCCACTCACTCTTACCTCAATCCCCACTCAC<br>TCTTACCTCAATCCTTT <b>GTTTGGCGGTGGAGGCGG</b> |

The primer binding sites are shown in bold and the detection sites are marked red.
